# Supplementary material for: Heterogeneity and prognosis of single organ metastases in gastric cancer
Source: PubMed Central journal article supplement — Transl Gastroenterol Hepatol. 2024 Sep 25;9:61. doi: 10.21037/tgh-24-11 (PMC11535815; doi:10.21037/tgh-24-11), 2024-09-25
Supplement: tgh-09-24-11-supplementary.pdf [file tgh-09-24-11-supplementary.pdf]

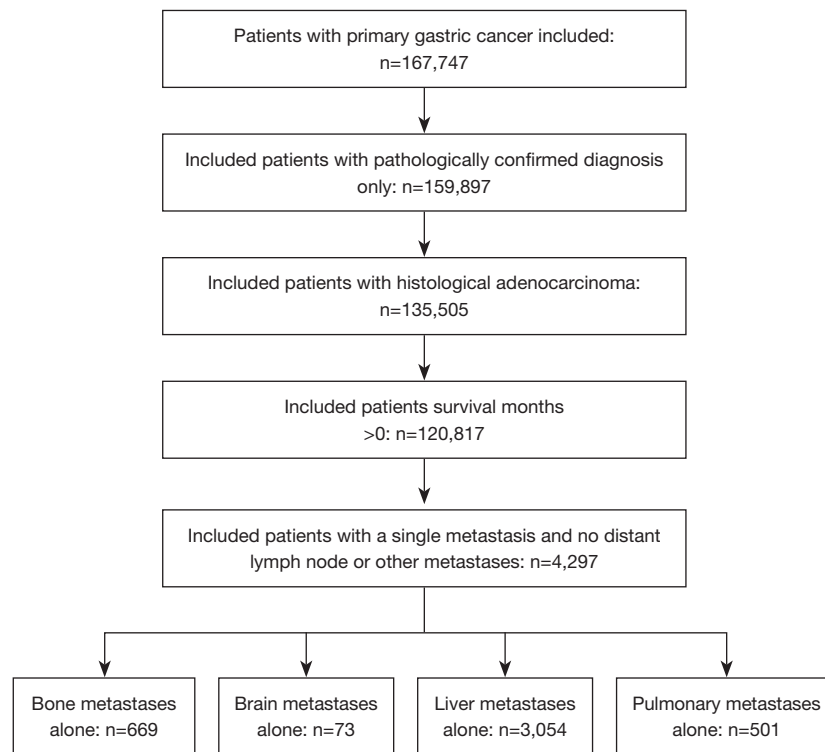

**Figure S1** Patient inclusion flow chart. Patient inclusion flow chart. Other metastases: include but are not limited to the adrenal gland, bone marrow, pleura, malignant pleural effusion, peritoneum, and skin.

**Table S1** Median survival of patients with different metastatic sites

| Met.type  | Numbers | Overall survival (months) |        | Disease-specific survival (months) |        |
|-----------|---------|---------------------------|--------|------------------------------------|--------|
|           |         | Median                    | 95% CI | Median                             | 95% CI |
| Met.liver | 3,054   | 6                         | 6–7    | 9                                  | 8–9    |
| Met.bone  | 669     | 5                         | 5–6    | 7                                  | 6–8    |
| Met.brain | 73      | 5                         | 4–8    | 7                                  | 5–18   |
| Met.lung  | 501     | 6                         | 5–7    | 9                                  | 7–10   |

CI, confidence interval; Met., metastasis.

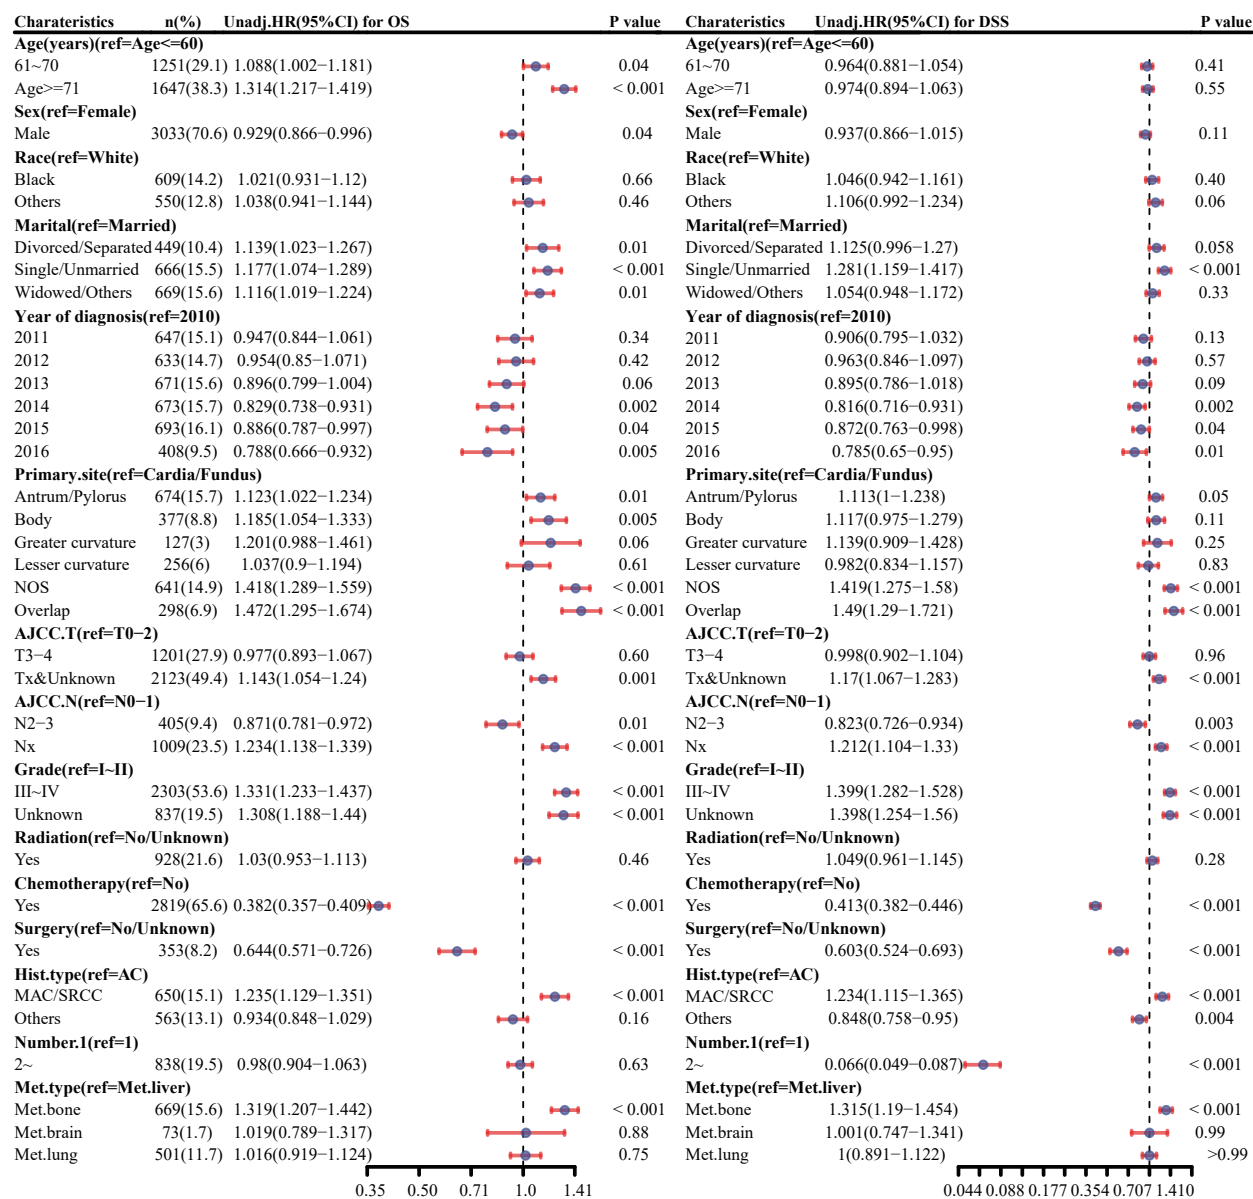

**Figure S2** Results of univariate Cox regression analysis. In the primary cohort, we performed univariate Cox regression analysis for OS and DSS separately, and plotted the forest plot. AC, adenocarcinoma; Unadj.HR, unadjusted hazard ratio; AJCC, American Joint Commission on Cancer; CI, confidence interval; DSS, disease-specific survival; Hist.type, histopathologic type; MAC, mucinous adenocarcinoma; Met., metastasis; NOS, not otherwise specified; OS, overall survival; ref, reference; SRCC, signet ring cell carcinoma.

**Table S2** Comparison of baseline information before and after PSM

| Variables                | Before PSM           |                  |        | After PSM          |                  |       |
|--------------------------|----------------------|------------------|--------|--------------------|------------------|-------|
|                          | Met.others (n=3,628) | Met.bone (n=669) | P      | Met.others (n=605) | Met.bone (n=605) | P     |
| Age(years), n (%)        |                      |                  | <0.001 |                    |                  | 0.55  |
| ≤60                      | 1,105 (30.5)         | 294 (43.9)       |        | 238 (39.3)         | 254 (42.0)       |       |
| 61–70                    | 1,067 (29.4)         | 184 (27.5)       |        | 169 (27.9)         | 169 (27.9)       |       |
| ≥71                      | 1,456 (40.1)         | 191 (28.6)       |        | 198 (32.7)         | 182 (30.1)       |       |
| Sex, n (%)               |                      |                  | <0.001 |                    |                  | 0.85  |
| Female                   | 1,025 (28.3)         | 239 (35.7)       |        | 211 (34.9)         | 207 (34.2)       |       |
| Male                     | 2,603 (71.7)         | 430 (64.3)       |        | 394 (65.1)         | 398 (65.8)       |       |
| Race, n (%)              |                      |                  | <0.001 |                    |                  | 0.42  |
| White                    | 2,635 (72.6)         | 503 (75.2)       |        | 446 (73.7)         | 455 (75.2)       |       |
| Black                    | 548 (15.1)           | 61 (9.1)         |        | 73 (12.1)          | 59 (9.8)         |       |
| Others                   | 445 (12.3)           | 105 (15.7)       |        | 86 (14.2)          | 91 (15.0)        |       |
| Marital, n (%)           |                      |                  | 0.09   |                    |                  | 0.37  |
| Married                  | 2,131 (58.7)         | 382 (57.1)       |        | 324 (53.6)         | 343 (56.7)       |       |
| Divorced/separated       | 383 (10.6)           | 66 (9.9)         |        | 55 (9.1)           | 62 (10.2)        |       |
| Single/unmarried         | 541 (14.9)           | 125 (18.7)       |        | 114 (18.8)         | 108 (17.9)       |       |
| Widowed/others           | 573 (15.8)           | 96 (14.3)        |        | 112 (18.5)         | 92 (15.2)        |       |
| Year of diagnosis, n (%) |                      |                  | 0.27   |                    |                  | 0.79  |
| 2010                     | 494 (13.6)           | 78 (11.7)        |        | 93 (15.4)          | 75 (12.4)        |       |
| 2011                     | 558 (15.4)           | 89 (13.3)        |        | 75 (12.4)          | 84 (13.9)        |       |
| 2012                     | 520 (14.3)           | 113 (16.9)       |        | 97 (16.0)          | 99 (16.4)        |       |
| 2013                     | 567 (15.6)           | 104 (15.5)       |        | 90 (14.9)          | 95 (15.7)        |       |
| 2014                     | 573 (15.8)           | 100 (14.9)       |        | 91 (15.0)          | 90 (14.9)        |       |
| 2015                     | 574 (15.8)           | 119 (17.8)       |        | 108 (17.9)         | 104 (17.2)       |       |
| 2016                     | 342 (9.4)            | 66 (9.9)         |        | 51 (8.4)           | 58 (9.6)         |       |
| Primary site, n (%)      |                      |                  | <0.001 |                    |                  | 0.98  |
| Cardia/fundus            | 1,682 (46.4)         | 242 (36.2)       |        | 227 (37.5)         | 238 (39.3)       |       |
| Antrum/pylorus           | 582 (16.0)           | 92 (13.8)        |        | 84 (13.9)          | 79 (13.1)        |       |
| Body                     | 309 (8.5)            | 68 (10.2)        |        | 56 (9.3)           | 57 (9.4)         |       |
| Greater curvature        | 106 (2.9)            | 21 (3.1)         |        | 23 (3.8)           | 21 (3.5)         |       |
| Lesser curvature         | 219 (6.0)            | 37 (5.5)         |        | 42 (6.9)           | 36 (6.0)         |       |
| NOS                      | 488 (13.5)           | 153 (22.9)       |        | 121 (20.0)         | 125 (20.7)       |       |
| Overlap                  | 242 (6.7)            | 56 (8.4)         |        | 52 (8.6)           | 49 (8.1)         |       |
| AJCC T stage, n (%)      |                      |                  | 0.01   |                    |                  | 0.99  |
| T0–2                     | 840 (23.2)           | 133 (19.9)       |        | 124 (20.5)         | 123 (20.3)       |       |
| T3–4                     | 1,031 (28.4)         | 170 (25.4)       |        | 163 (26.9)         | 164 (27.1)       |       |
| Tx & unknown             | 1,757 (48.4)         | 366 (54.7)       |        | 318 (52.6)         | 318 (52.6)       |       |
| AJCC N stage, n (%)      |                      |                  | 0.27   |                    |                  | 0.53  |
| N0–1                     | 2,443 (67.3)         | 440 (65.8)       |        | 416 (68.8)         | 399 (66)         |       |
| N2–3                     | 348 (9.6)            | 57 (8.5)         |        | 54 (8.9)           | 55 (9.1)         |       |
| Nx                       | 837 (23.1)           | 172 (25.7)       |        | 135 (22.3)         | 151 (25.0)       |       |
| Grade, n (%)             |                      |                  | <0.001 |                    |                  | 0.69  |
| I–II                     | 1,094 (30.2)         | 63 (9.4)         |        | 63 (10.4)          | 62 (10.2)        |       |
| III–IV                   | 1,844 (50.8)         | 459 (68.6)       |        | 420 (69.4)         | 409 (67.6)       |       |
| Unknown                  | 690 (19.0)           | 147 (22.0)       |        | 122 (20.2)         | 134 (22.1)       |       |
| Radiation, n (%)         |                      |                  | <0.001 |                    |                  | 0.95  |
| No/unknown               | 2,947 (81.2)         | 422 (63.1)       |        | 401 (66.3)         | 399 (66.0)       |       |
| Yes                      | 681 (18.8)           | 247 (36.9)       |        | 204 (33.7)         | 206 (34.0)       |       |
| Chemotherapy, n (%)      |                      |                  | 0.88   |                    |                  | 0.43  |
| No                       | 1,250 (34.5)         | 228 (34.1)       |        | 224 (37.0)         | 210 (34.7)       |       |
| Yes                      | 2,378 (65.5)         | 441 (65.9)       |        | 381 (63.0)         | 395 (65.3)       |       |
| Surgery, n (%)           |                      |                  | <0.001 |                    |                  | >0.99 |
| No/unknown               | 3,307 (91.2)         | 637 (95.2)       |        | 574 (94.9)         | 574 (94.9)       |       |
| Yes                      | 321 (8.8)            | 32 (4.8)         |        | 31 (5.1)           | 31 (5.1)         |       |
| Histological type, n (%) |                      |                  | <0.001 |                    |                  | 0.74  |
| AC                       | 2,737 (75.4)         | 347 (51.9)       |        | 349 (57.7)         | 344 (56.9)       |       |
| MAC/SRCC                 | 395 (10.9)           | 255 (38.1)       |        | 199 (32.9)         | 196 (32.4)       |       |
| Others                   | 496 (13.7)           | 67 (10.0)        |        | 57 (9.4)           | 65 (10.7)        |       |
| Numbers of sites, n (%)  |                      |                  | 0.59   |                    |                  | 0.77  |
| 1                        | 2,926 (80.7)         | 533 (79.7)       |        | 476 (78.7)         | 481 (79.5)       |       |
| ≥2                       | 702 (19.3)           | 136 (20.3)       |        | 129 (21.3)         | 124 (20.5)       |       |

PSM, propensity score matching; NOS, not otherwise specified; AJCC, American Joint Commission on Cancer; AC, adenocarcinoma; MAC, mucinous adenocarcinoma; SRCC, signet ring cell carcinoma; Met., metastasis; Met.others, metastasis to lung, liver, brain.

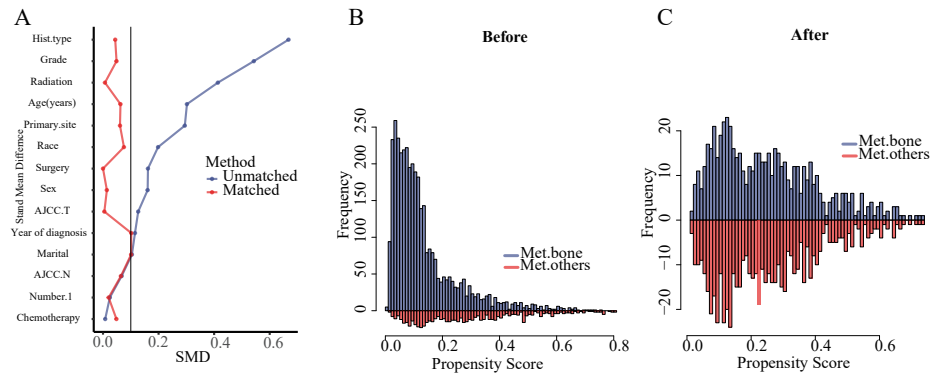

**Figure S3** Before and after outcomes of patients' propensity matching scores. We have made a comparison of the data before and after matching. (A) The standardized mean differences before and after matching, and the standardized mean differences after matching were  $< 0.1$ , suggesting a good match. The histograms before (B) and after (C) matching show good symmetry and balanced distribution of scores between the two groups. AJCC, American Joint Commission on Cancer; Hist.type, histopathologic type; Met., metastasis; SMD, standardized mean difference.

**Table S3** Results of univariate Cox regression analysis after PSM

| Variables                                          | OS                  |         | DSS                 |         |
|----------------------------------------------------|---------------------|---------|---------------------|---------|
|                                                    | HR (95% CI)         | P value | HR (95% CI)         | P value |
| Age (61–70 vs. ≤60 years)                          | 1.122 (0.969–1.3)   | 0.12    | 0.971 (0.826–1.141) | 0.71    |
| Age (≥71 vs. ≤60 years)                            | 1.344 (1.166–1.55)  | <0.001  | 0.923 (0.781–1.091) | 0.34    |
| Sex (male vs. female)                              | 0.953 (0.841–1.08)  | 0.45    | 0.986 (0.855–1.137) | 0.84    |
| Race (black vs. white)                             | 1.119 (0.922–1.359) | 0.25    | 1.313 (1.065–1.62)  | 0.01    |
| Race (others vs. white)                            | 0.906 (0.76–1.081)  | 0.27    | 1.043 (0.86–1.265)  | 0.66    |
| Marital (divorced/separated vs. married)           | 0.987 (0.8–1.219)   | 0.90    | 0.956 (0.75–1.219)  | 0.71    |
| Marital (single/unmarried vs. married)             | 1.174 (1–1.38)      | 0.05    | 1.314 (1.103–1.567) | 0.002   |
| Marital (widowed/others vs. married)               | 1.146 (0.969–1.355) | 0.11    | 1.02 (0.837–1.244)  | 0.84    |
| Year of diagnosis (2011 vs. 2010)                  | 1.051 (0.843–1.31)  | 0.65    | 0.992 (0.772–1.275) | 0.94    |
| Year of diagnosis (2012 vs. 2010)                  | 0.951 (0.771–1.173) | 0.64    | 0.922 (0.727–1.169) | 0.50    |
| Year of diagnosis (2013 vs. 2010)                  | 0.816 (0.658–1.011) | 0.06    | 0.82 (0.644–1.043)  | 0.10    |
| Year of diagnosis (2014 vs. 2010)                  | 0.849 (0.684–1.054) | 0.13    | 0.85 (0.666–1.084)  | 0.19    |
| Year of diagnosis (2015 vs. 2010)                  | 0.861 (0.696–1.066) | 0.16    | 0.834 (0.656–1.062) | 0.14    |
| Year of diagnosis (2016 vs. 2010)                  | 0.677 (0.487–0.941) | 0.02    | 0.684 (0.471–0.992) | 0.04    |
| Primary site (antrum/pylorus vs. cardia/fundus)    | 1.305 (1.079–1.579) | 0.006   | 1.275 (1.027–1.582) | 0.02    |
| Primary site (body vs. cardia/fundus)              | 1.285 (1.034–1.599) | 0.02    | 1.136 (0.878–1.47)  | 0.33    |
| Primary site (greater curvature vs. cardia/fundus) | 0.959 (0.682–1.349) | 0.81    | 0.878 (0.588–1.309) | 0.52    |
| Primary site (lesser curvature vs. cardia/fundus)  | 1.2 (0.928–1.552)   | 0.16    | 1.097 (0.812–1.483) | 0.54    |
| Primary site (NOS vs. cardia/fundus)               | 1.271 (1.079–1.496) | 0.004   | 1.276 (1.062–1.534) | 0.009   |
| Primary site (overlap vs. cardia/fundus)           | 1.432 (1.14–1.798)  | 0.002   | 1.569 (1.224–2.011) | <0.001  |
| AJCC T stage (T3–4 vs. T0–2)                       | 1.069 (0.898–1.271) | 0.45    | 1.168 (0.958–1.423) | 0.12    |
| AJCC T stage (Tx & unknown vs. T0–2)               | 1.337 (1.142–1.565) | <0.001  | 1.412 (1.177–1.693) | <0.001  |
| AJCC N stage (N2–3 vs. N0–1)                       | 0.819 (0.665–1.01)  | 0.06    | 0.794 (0.625–1.008) | 0.05    |
| AJCC N stage (Nx vs. N0–1)                         | 1.213 (1.042–1.412) | 0.01    | 1.184 (0.995–1.408) | 0.05    |
| Grade (III–IV vs. I–II)                            | 1.211 (0.988–1.483) | 0.06    | 1.297 (1.024–1.644) | 0.03    |
| Grade (unknown vs. I–II)                           | 1.376 (1.094–1.731) | 0.006   | 1.489 (1.141–1.942) | 0.003   |
| Radiation (yes vs. no/unknown)                     | 0.928 (0.818–1.053) | 0.24    | 0.893 (0.773–1.032) | 0.12    |
| Chemotherapy (yes vs. no)                          | 0.398 (0.351–0.452) | <0.001  | 0.45 (0.389–0.52)   | <0.001  |
| Surgery (yes vs. no/unknown)                       | 0.592 (0.45–0.779)  | <0.001  | 0.562 (0.408–0.773) | <0.001  |
| Histological type (MAC/SRCC vs. AC)                | 1.04 (0.913–1.186)  | 0.55    | 1.064 (0.918–1.233) | 0.41    |
| Histological type (others vs. AC)                  | 0.935 (0.76–1.15)   | 0.52    | 0.873 (0.686–1.111) | 0.26    |
| Numbers of sites (≥2 vs. 1)                        | 1.071 (0.925–1.239) | 0.36    | 0.096 (0.062–0.148) | <0.001  |
| Met.bone vs. Met.others                            | 1.187 (1.053–1.339) | 0.005   | 1.208 (1.054–1.385) | 0.007   |

PSM, propensity score matching; NOS, not otherwise specified; AJCC, American Joint Commission on Cancer; MAC, mucinous adenocarcinoma; SRCC, signet ring cell carcinoma; AC, adenocarcinoma; Met., metastasis; Met.others, metastasis to lung, liver, brain; OS, overall survival; DSS, disease-specific survival; HR, hazard ratio; CI, confidence interval.

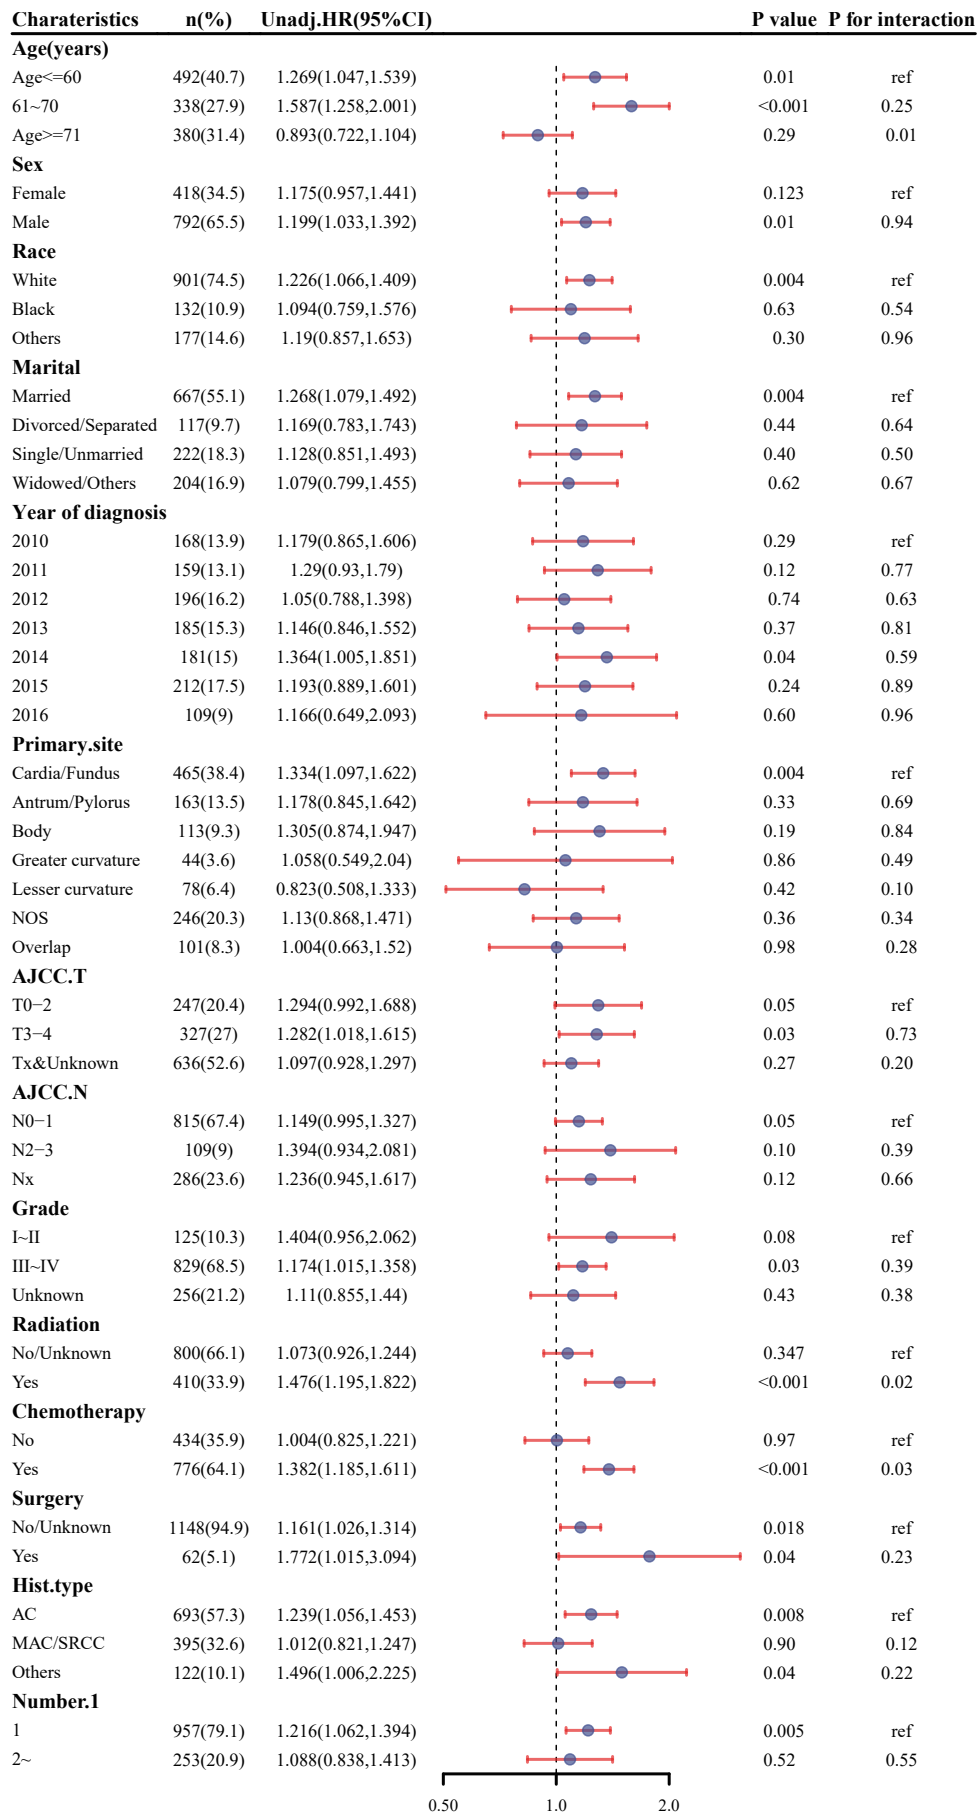

**Figure S4** Results of subgroup analysis of bone metastases on OS. We performed a subgroup univariate Cox regression analysis with bone metastasis as the independent variable on the data after PSM. We calculated the interaction between subgroups and bone metastasis and plotted the forest plot. AC, adenocarcinoma; AJCC, American Joint Commission on Cancer; CI, confidence interval; Hist.type, histopathologic type; NOS, not otherwise specified; MAC, mucinous adenocarcinoma; OS, overall survival; ref, reference; PSM, propensity score matching; SRCC, signet ring cell carcinoma; Unadj.HR, unadjusted hazard ratio.

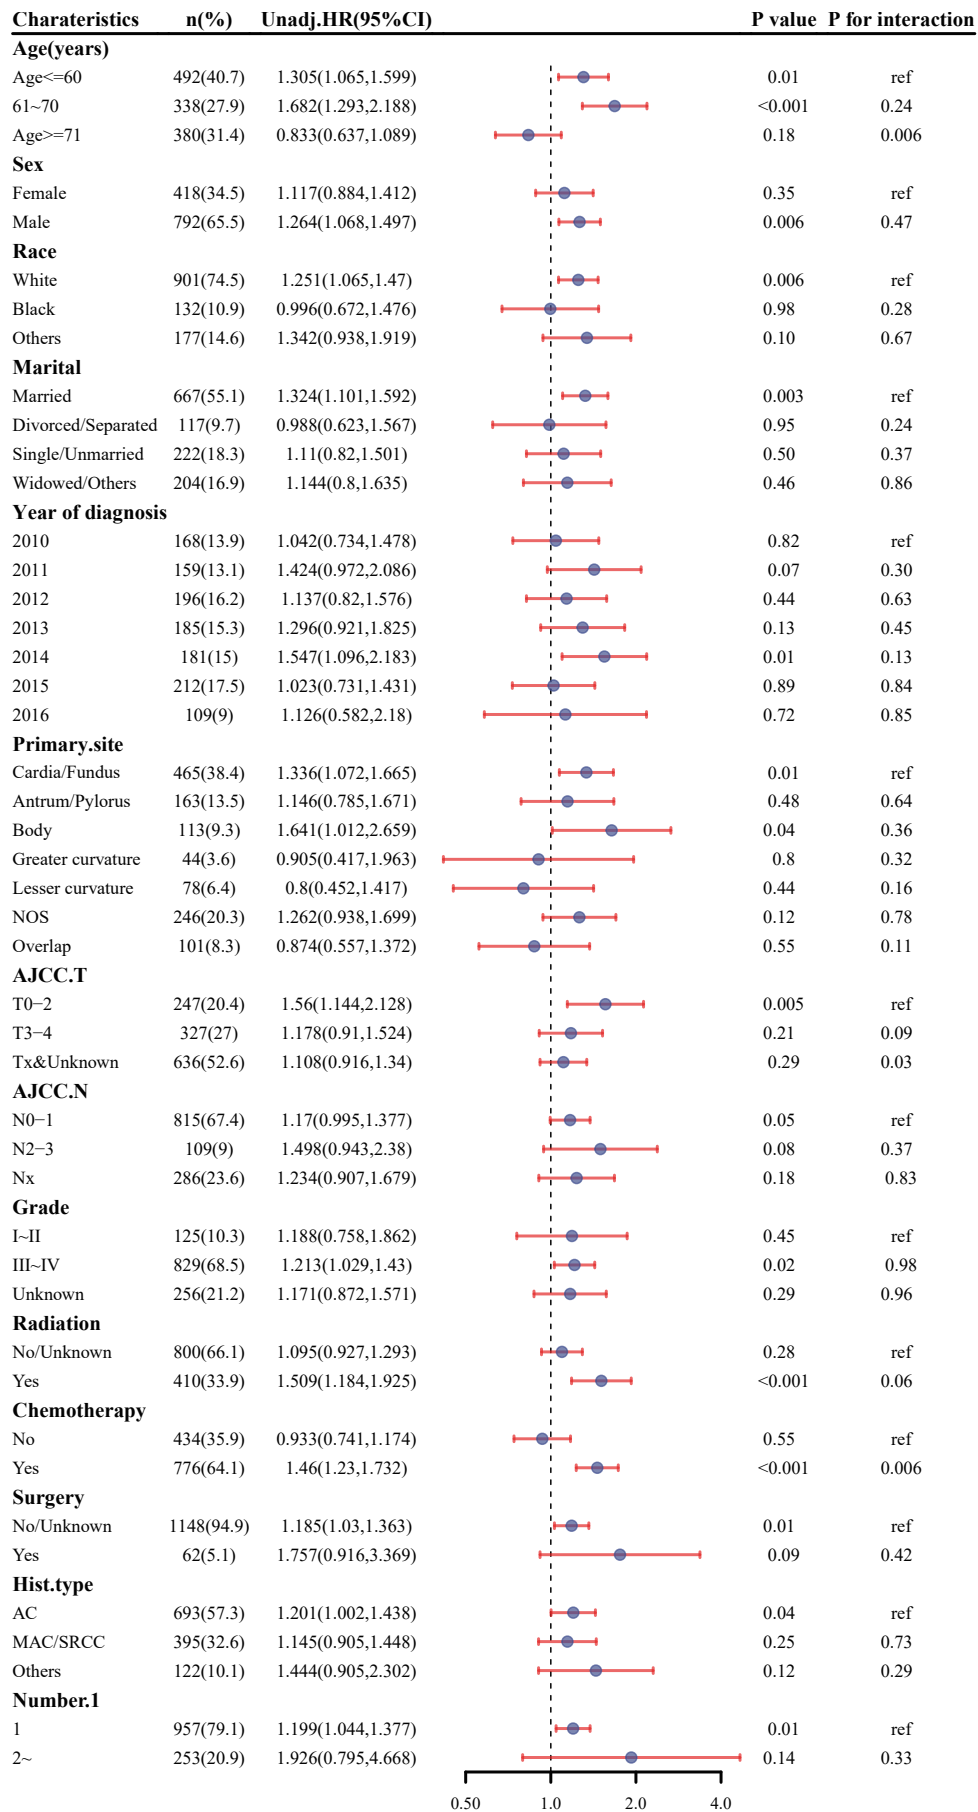

**Figure S5** Results of subgroup analysis of bone metastases on DSS. We performed a subgroup univariate Cox regression analysis on the data after PSM. In this analysis, we used bone metastasis as the independent variable and DSS as the outcome variable and calculated the interaction between different factors and DSS. AC, adenocarcinoma; AJCC, American Joint Commission on Cancer; CI, confidence interval; DSS, disease-specific survival; Hist.type, histopathologic type; NOS, not otherwise specified; MAC, mucinous adenocarcinoma; ref, reference; PSM, propensity score matching; SRCC, signet ring cell carcinoma; Unadj.HR, unadjusted hazard ratio.
